# Supplementary material for: Insights into Degron Recognition by APC/C Coactivators from the Structure of an Acm1-Cdh1 Complex
Source: PubMed Central journal article supplement — Mol Cell. 2013 Jun 6;50(5):649–60. doi: 10.1016/j.molcel.2013.04.024 (PMC3690534; doi:10.1016/j.molcel.2013.04.024), 2013-06-06
Supplement: mmc1.pdf [file mmc1.pdf]

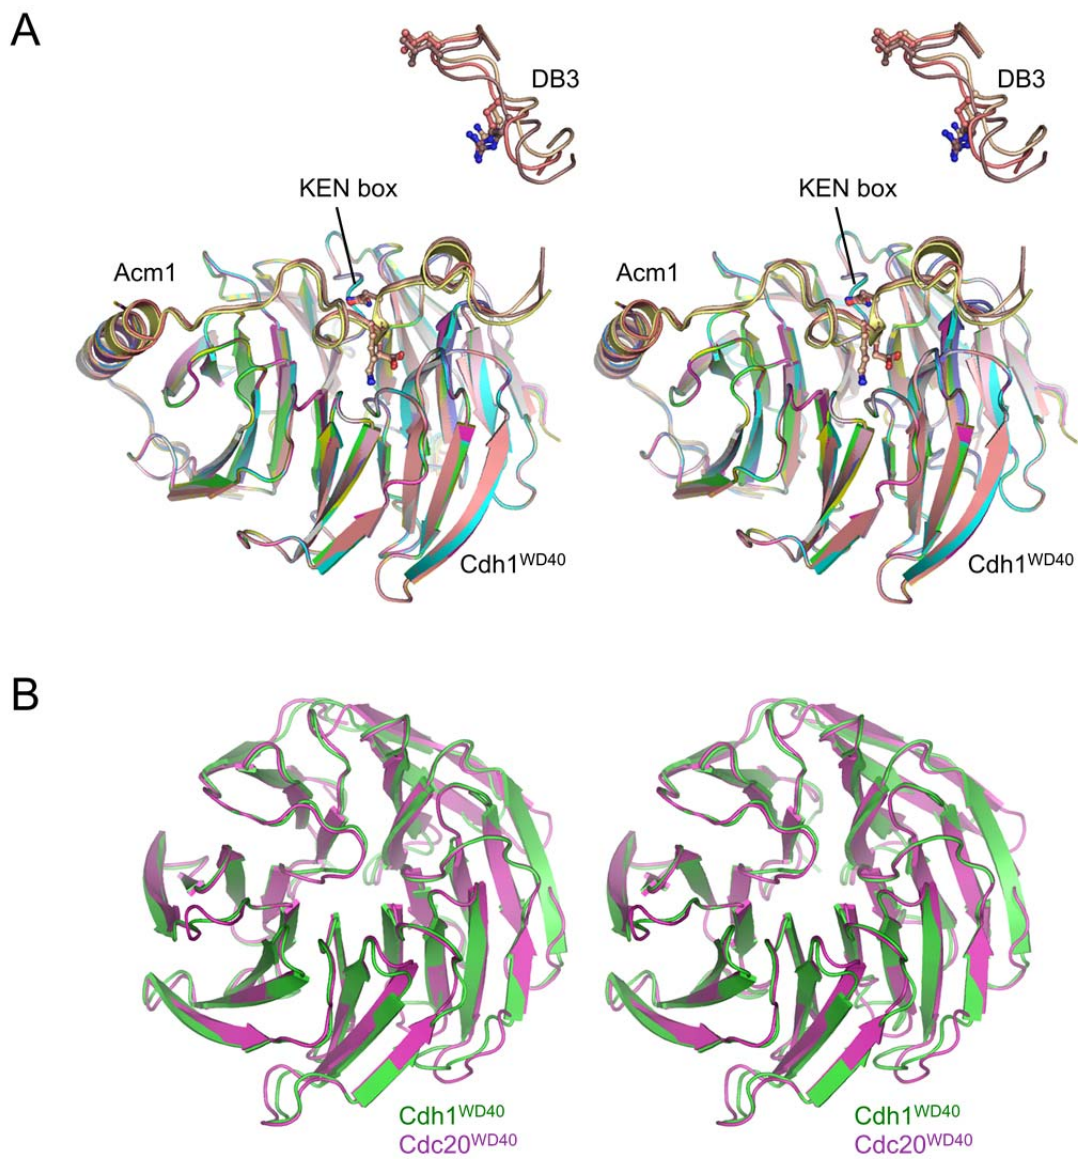

**Figure S1. Comparison of Acm1<sup>CIR</sup>-Cdh1<sup>WD40</sup> Complexes and Cdh1<sup>WD40</sup> and Cdc20<sup>WD40</sup> Structures, Related to Figure 1**

(A) Stereoview showing superimposition of eight Acm1<sup>CIR</sup>-Cdh1<sup>WD40</sup> heterodimers comprising the unit cell asymmetric. Acm1<sup>CIR</sup> chain I and Cdh1<sup>WD40</sup> chain A were reference structures. KEN box and DB3 (present in three Acm1 chains) are shown. (B) Stereoview showing superimposition of Cdh1<sup>WD40</sup> (chain A) and Cdc20<sup>WD40</sup> (PDB ID: 4AEZ; Chao *et al.*, (2012)).

1. Superimposition of eight Cdh1 subunits of the asymmetric unit. Superimposition based on C $\alpha$ -atoms. Superscript refers to the chain identification. For Figure S1A.

| Subunit             | Residues | Cdh1-A <sup>B</sup> | Cdh1-A <sup>C</sup> | Cdh1-A <sup>D</sup> | Cdh1-B <sup>E</sup> | Cdh1-B <sup>F</sup> | Cdh1-B <sup>G</sup> | Cdh1-B <sup>H</sup> |
|---------------------|----------|---------------------|---------------------|---------------------|---------------------|---------------------|---------------------|---------------------|
| Cdh1-A <sup>A</sup> | 245-548  | 0.12 Å              | 0.12 Å              | 0.11 Å              | 0.35 Å              | 0.17 Å              | 0.14 Å              | 0.09 Å              |
| Cdh1-A <sup>B</sup> | 245-548  | -                   | 0.11 Å              | 0.14 Å              | 0.32 Å              | 0.20 Å              | 0.09 Å              | 0.06 Å              |
| Cdh1-A <sup>C</sup> | 245-548  | -                   | -                   | 0.17 Å              | 0.37 Å              | 0.14 Å              | 0.14 Å              | 0.05 Å              |
| Cdh1-A <sup>D</sup> | 244-548  | -                   | -                   | -                   | 0.32 Å              | 0.20 Å              | 0.09 Å              | 0.05 Å              |
| Cdh1-B <sup>E</sup> | 246-548  | -                   | -                   | -                   | -                   | 0.37 Å              | 0.15 Å              | 0.05 Å              |
| Cdh1-B <sup>F</sup> | 245-547  | -                   | -                   | -                   | -                   | -                   | 0.11 Å              | 0.05 Å              |
| Cdh1-B <sup>G</sup> | 245-546  | -                   | -                   | -                   | -                   | -                   | -                   | 0.05 Å              |
| Cdh1-B <sup>H</sup> | 248-546  | -                   | -                   | -                   | -                   | -                   | -                   | -                   |

2. Superimposition of eight Acm1 subunits of the asymmetric unit. Superimposition based on C $\alpha$ -atoms. Superscript refers to the chain identification. For Figure S1A.

| Subunit             | Residues | Acm1-A <sup>I</sup> | Acm1-A <sup>K</sup> | Acm1-A <sup>L</sup> | Acm1-B <sup>M</sup> | Acm1-B <sup>N</sup> | Acm1-B <sup>O</sup> | Acm1-B <sup>P</sup> |
|---------------------|----------|---------------------|---------------------|---------------------|---------------------|---------------------|---------------------|---------------------|
| Acm1-A <sup>I</sup> | 60-125   | 0.94 Å              | 0.94 Å              | 0.06 Å              | 0.92 Å              | 0.63 Å              | 0.60 Å              | 0.86 Å              |
| Acm1-A <sup>J</sup> | 60-109   | -                   | 0.51 Å              | 0.08 Å              | 0.91 Å              | 0.63 Å              | 0.60 Å              | 0.86 Å              |
| Acm1-A <sup>K</sup> | 60-125   | -                   | -                   | 0.07 Å              | 0.92 Å              | 0.63 Å              | 0.60 Å              | 0.87 Å              |
| Acm1-A <sup>L</sup> | 60-125   | -                   | -                   | -                   | 0.91 Å              | 0.62 Å              | 0.59 Å              | 0.86 Å              |
| Acm1-B <sup>M</sup> | 60-80    | -                   | -                   | -                   | -                   | 0.12 Å              | 0.15 Å              | 0.21 Å              |
| Acm1-B <sup>N</sup> | 60-79    | -                   | -                   | -                   | -                   | -                   | 0.24 Å              | 0.21 Å              |
| Acm1-B <sup>O</sup> | 60-79    | -                   | -                   | -                   | -                   | -                   | -                   | 0.22 Å              |
| Acm1-B <sup>P</sup> | 60-80    | -                   | -                   | -                   | -                   | -                   | -                   | -                   |

3. Summary of superimposition of Cdh1 and Acm1 subunits of the asymmetric unit. Superimposition based on C $\alpha$ -atoms.

| Subunits superimposed | Subunits (N) | Mean RMSD (Å) | RMSD range (Å) |
|-----------------------|--------------|---------------|----------------|
| Cdh1-A to Cdh1-A      | 6            | 0.13          | 0.11 to 0.17   |
| Cdh1-B to Cdh1-B      | 6            | 0.13          | 0.05 to 0.37   |
| Cdh1-A to Cdh1-B      | 16           | 0.16          | 0.05 to 0.35   |
| All Cdh1 to Cdh1      | 28           | 0.15          | 0.05 to 0.37   |
| Acm1-A to Acm1-A      | 6            | 0.43          | 0.07 to 0.94   |
| Acm1-B to Acm1-B      | 6            | 0.11          | 0.12 to 0.24   |
| Acm1-A to Acm1-B      | 16           | 0.32          | 0.59 to 0.92   |
| All Acm1 to Acm1      | 28           | 0.30          | 0.07 to 0.94   |

4. Superimposition of *S. cerevisiae* Cdh1<sup>WD40-A</sup> to *S. pombe* Cdc20<sup>WD40</sup> (PDB: 4AEZ, Chao et al., (2012). RMSD = 0.9 Å for 314 equivalent C $\alpha$ -atoms. For Figure S1B.

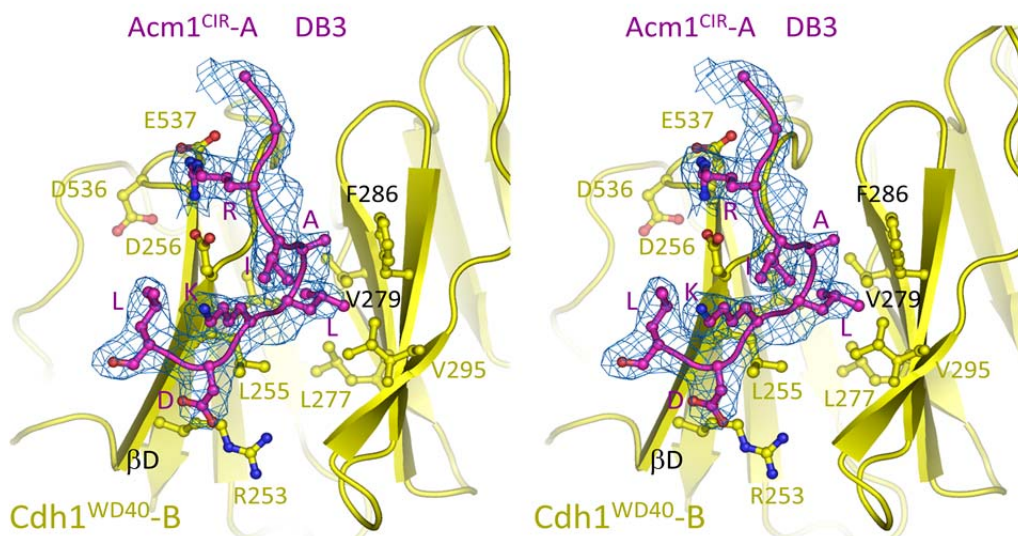

**Figure S2. Structure of the D Box Receptor, Related to Figure 4**

Stereoview showing electron density of DB3 of *S. cerevisiae* Acm1-A (residues 119-127) bound to the WD40 domain of Cdh1-B. Shown are: RIALKDL of Acm1<sup>CIR-A</sup> DB3. Map shown is 2Fo-Fc map contoured at 1 $\sigma$ .

# A

## D box

| UniProt | D-box sequence                                             | Protein name, species and ref                              |
|---------|------------------------------------------------------------|------------------------------------------------------------|
| P07818  | QKPAQ <b>RAAL</b> GNISNVVVRTA                              | ( <i>A.p.</i> G2/mitotic cyclin B) <sup>1,2</sup>          |
| P10815  | NVPPK <b>RHAL</b> DDVSNFHNKE                               | ( <i>S.p.</i> Cdc13) <sup>3</sup>                          |
| P20248  | QQPRT <b>RAAL</b> AVLKSGNPRG                               | ( <i>H.s.</i> Cyclin A2) <sup>4</sup>                      |
| P14635  | PGLRP <b>RTAL</b> GDIGNKVSEQ                               | ( <i>H.s.</i> Cyclin B1) <sup>5</sup>                      |
| P24869  | LRNVQ <b>RLAL</b> NNVTNTTFQK                               | ( <i>S.c.</i> Clb2) <sup>6</sup>                           |
| P30283  | QDSKP <b>RRAL</b> TDVPVNNNPL                               | ( <i>S.c.</i> Clb5) <sup>7</sup>                           |
| P13350  | PGLRP <b>RTAL</b> GDIGNKAEVK                               | ( <i>X.l.</i> G2/mitotic cyclin-B1) <sup>1,2</sup>         |
| P18606  | PNLPQ <b>RTVL</b> GVIGDNEQRR                               | ( <i>X.l.</i> G2/mitotic cyclin-A1) <sup>1,2,8,9</sup>     |
| P36630  | INLPR <b>RTL</b> SDVSNVVGKNN                               | ( <i>S.p.</i> Cig2 (cyclin) <sup>10</sup>                  |
| P21135  | GAGSK <b>RAP</b> LGSTKQSNAPS                               | ( <i>S.p.</i> Cut2) <sup>11</sup>                          |
| P21135  | SVTVP <b>RTL</b> GGKSTNISKF                                | ( <i>S.p.</i> Cut2) <sup>11</sup>                          |
| P34244  | EQKPK <b>RAAL</b> SDITNSFNKM                               | ( <i>S.c.</i> Hsl1) <sup>12</sup>                          |
| P40316  | AQQQ <b>RLPL</b> AAKDNRSKS                                 | ( <i>S.c.</i> Pds1) <sup>13</sup>                          |
| O95997  | LPKAT <b>RKAL</b> GTVNRATEKS                               | ( <i>H.s.</i> PTTG1) <sup>14</sup>                         |
| O00429  | VTCLL <b>RKRL</b> PVTNEMVHNL                               | ( <i>H.s.</i> Dynamin) <sup>15</sup>                       |
| O75496  | NSSVP <b>RRTL</b> KMIQPSASGS                               | ( <i>H.s.</i> Geminin) <sup>16</sup>                       |
| P03116  | SDSNAR <b>AF</b> LATNSQAKHVK                               | ( <i>B. papillomavirus</i> E1) <sup>17</sup>               |
| P12757  | VGGEK <b>RLCL</b> PQVLNSVLRE                               | ( <i>H.s.</i> SnoN) <sup>18</sup>                          |
| P15036  | VANSY <b>RGT</b> LKRQPAFDTFD                               | ( <i>H.s.</i> ETS family) <sup>19</sup>                    |
| P24699  | ATMRE <b>RRRL</b> KKVNQAFETL                               | ( <i>M.m.</i> Myf5) <sup>17</sup>                          |
| P32325  | KRSLE <b>RLE</b> LQQQHLHEKK                                | ( <i>S.c.</i> Dbf4) <sup>20</sup>                          |
| P33981  | AEIGY <b>RNS</b> LROTNKTKQSC                               | ( <i>H.s.</i> Mps1) <sup>21</sup>                          |
| P38936  | GPRRG <b>RED</b> LGGRRRPGTSP                               | ( <i>H.s.</i> CDKN1A) <sup>22</sup>                        |
| P39001  | HNKTS <b>RAT</b> LMNNSQDGKKH                               | ( <i>S.c.</i> Ume6) <sup>23</sup>                          |
| P41005  | RRPLQ <b>RRPL</b> QELSIELVKP                               | ( <i>S.p.</i> Mes1) <sup>24</sup>                          |
| P41134  | RGLPV <b>RAP</b> LSTLNGEISAL                               | ( <i>H.s.</i> ID1) <sup>25</sup>                           |
| P42261  | EHA <b>AF</b> RFALSQLTEPPKLL                               | ( <i>H.s.</i> GluR1) <sup>26</sup>                         |
| P42261  | FVLQ <b>L</b> RPELQDALISIIDH                               | ( <i>H.s.</i> GluR1) <sup>26</sup>                         |
| P47074  | RPKIS <b>RKAL</b> VSKSLTPSNQ                               | ( <i>S.c.</i> Mad3) <sup>27</sup>                          |
| P51955  | SLLKE <b>RKFL</b> SLASNPPELLN                              | ( <i>H.s.</i> Nek2A) <sup>28</sup>                         |
| P53350  | LDPSN <b>RKPL</b> TVLNKGLENP                               | ( <i>H.s.</i> Plk1) <sup>29</sup>                          |
| P32562  | KQLN <b>T</b> RSKLVHTPIKGNTA                               | ( <i>S.c.</i> Cdc5) <sup>30</sup>                          |
| P32562  | AQKK <b>K</b> REKLSALCKTPPSL                               | ( <i>S.c.</i> Cdc5) <sup>30</sup>                          |
| P53718  | SIMQ <b>RLPL</b> GEFSSSKINK                                | ( <i>S.c.</i> NRM1) <sup>31</sup>                          |
| P54792  | LEIRD <b>RMWL</b> KITIANAVIG                               | ( <i>H.s.</i> DVL-1) <sup>32</sup>                         |
| Q02363  | QNQAS <b>R</b> TPLTTLN <sup>25</sup> TDISIL                | ( <i>H.s.</i> ID2) <sup>25</sup>                           |
| Q04116  | FNAYER <b>KPL</b> GEVDLNSFKN                               | ( <i>S.c.</i> YHP1) <sup>31</sup>                          |
| Q07820  | SGATS <b>RKAL</b> ETLRRVGDGV                               | ( <i>H.s.</i> Mcl-1) <sup>33</sup>                         |
| Q08050  | MKTSP <b>RRPL</b> ILKRRRLPLP                               | ( <i>H.s.</i> FoxM1) <sup>34</sup>                         |
| Q08050  | ILKRR <b>RLPL</b> PVQNAPSETS                               | ( <i>H.s.</i> FoxM1) <sup>34</sup>                         |
| Q08981  | SPSK <b>K</b> RTILSSKNINQKPR                               | ( <i>S.c.</i> Acml-DB1 (Cdc20)) <sup>+</sup> <sup>35</sup> |
| Q08981  | LREGG <b>R</b> IALKDL <sup>35,36,37</sup> SVDEFKG          | ( <i>S.c.</i> Acml-DB3) <sup>35,36,37</sup>                |
| Q13309  | M <b>H</b> RKHLQ <b>E</b> IPDLSSNV                         | ( <i>H.s.</i> Skp2) <sup>38,39</sup>                       |
| Q15303  | IQGD <b>D</b> RMKLPSPNDSKFFQ                               | ( <i>H.s.</i> ErbB4) <sup>40</sup>                         |
| Q15784  | LQLNS <b>RN</b> FLTEQGADGAGR                               | ( <i>H.s.</i> NEUROD2) <sup>41</sup>                       |
| Q5FBB7  | TQOSP <b>HLS</b> LKDITNVSLYP                               | ( <i>H.s.</i> Shugosin-like) <sup>42</sup>                 |
| Q9CXH7  | TOQ <b>SP</b> RCSLKDV <sup>42</sup> TN <sup>42</sup> ILQCP | ( <i>M.m.</i> Shugosin) <sup>42</sup>                      |
| O191820 | HNP <b>NH</b> RLPLKGVLEHPWII                               | ( <i>X.l.</i> Aurora A) <sup>43,44</sup>                   |
| Q96GD4  | HNP <b>S</b> ERLPLAQVSAHPWVR                               | ( <i>H.s.</i> Aurora B) <sup>45</sup>                      |
| Q969U6  | AKEGL <b>RHF</b> LDRVLEGRAQP                               | ( <i>H.s.</i> FboxW5) <sup>46</sup>                        |
| Q96RU7  | FADRE <b>RKK</b> L <sup>47</sup> VLENLEDS <sup>47</sup> CV | ( <i>H.s.</i> TRIB3) <sup>47</sup>                         |
| Q99741  | LPLSP <b>RKRL</b> GDDNLCNTPH                               | ( <i>H.s.</i> Cdc6) <sup>48</sup>                          |
| Q9BSJ6  | FQFQ <b>R</b> RLPLRAVNLNLRAG                               | ( <i>H.s.</i> Fam64A/RCS1) <sup>49</sup>                   |
| Q9D1C1  | ALYDV <b>RT</b> ILL <sup>50</sup> SIQSLLGEP                | ( <i>M.m.</i> UbcH10) <sup>50</sup>                        |
| Q9LGE3  | FQFH <b>K</b> RGS <sup>51</sup> LDLISLPADFS                | ( <i>O.s.</i> FPF1-like protein) <sup>51</sup>             |
| Q9NQW6  | HAKRA <b>RQPL</b> SEASNQOPLS                               | ( <i>H.s.</i> ANLN) <sup>52</sup>                          |

|        |                                               |                                           |
|--------|-----------------------------------------------|-------------------------------------------|
| Q9NYD6 | APFEQ <b>RAS</b> LN <b>PRAE</b> HLESP         | ( <i>H.s.</i> HOXC10) <sup>53</sup>       |
| Q9NYD6 | WFQNR <b>RMK</b> L <b>KKM</b> NREN <b>RIR</b> | ( <i>H.s.</i> HOXC10) <sup>53</sup>       |
| Q9UKT4 | EYVMF <b>RTPL</b> AS <b>VQK</b> SAAQT         | ( <i>H.s.</i> Fbxo5 (Emil)) <sup>54</sup> |
| Q99618 | SKVLG <b>RSPL</b> TIL <b>QDD</b> NSPG         | ( <i>H.s.</i> Tome-1) <sup>55</sup>       |
| Q96RL1 | SGDTS <b>RHCL</b> PT <b>LADAK</b> GLQ         | ( <i>H.s.</i> RAP80) <sup>56</sup>        |
| Q03898 | MSNKS <b>NRRSL</b> R <b>DIGN</b> TIGRN        | ( <i>S.c.</i> Fin1) <sup>57</sup>         |
| Q9NQW6 | HAKRA <b>RQPL</b> SE <b>ASN</b> QOPLS         | ( <i>H.s.</i> Anillin) <sup>52</sup>      |
| P50275 | HAVKP <b>RQLF</b> PI <b>PLNK</b> VDTK         | ( <i>S.c.</i> Ase1) <sup>58</sup>         |
| Q9Y2M0 | DKKR <b>PRRSL</b> SIS <b>KNKK</b> KAS         | ( <i>H.s.</i> Fan1) <sup>59</sup>         |

<sup>‡</sup>D box selective for Cdc20 (Ref. 35)

Text version of **Figure 5A**.

**R**RL**P**LGDVSNN (most frequent)  
 KHKAFSEINLS  
 E TS KTLTR  
 RK TSAQI  
 AT POTLE  
 F AVKGD  
 V QPA (least frequent)

## B

### KEN box

| UniProt | KEN-box sequence                                                                          | Protein name, species and ref                      |
|---------|-------------------------------------------------------------------------------------------|----------------------------------------------------|
| O59767  | DVIEQ <b>S</b> K <b>EN</b> IE <b>P</b> RKAGHS                                             | ( <i>S.p.</i> Mad3) <sup>27,60</sup>               |
| O60566  | DEWEL <b>S</b> K <b>EN</b> VQ <b>P</b> LRQGR                                              | ( <i>H.s.</i> Bub1b) <sup>61</sup>                 |
| O43683  | VFEDG <b>N</b> K <b>EN</b> YGL <b>P</b> QPKNK                                             | ( <i>H.s.</i> Bub1) <sup>62</sup>                  |
| O43683  | SVILED <b>K</b> EN <b>V</b> VAK <b>Q</b> CTQA                                             | ( <i>H.s.</i> Bub1) <sup>62</sup>                  |
| O76755  | MDFDNA <b>K</b> EN <b>I</b> Q <b>P</b> LASGRN                                             | ( <i>D.m.</i> BubR1) <sup>27</sup>                 |
| P47074  | EEIET <b>Q</b> EN <b>I</b> L <b>P</b> LKEGRS                                              | ( <i>S.c.</i> MAD3-1) <sup>60</sup>                |
| Q08981  | NNPSQ <b>V</b> EN <b>L</b> S <b>P</b> AKICPY                                              | ( <i>S.c.</i> AC1) <sup>35,36,37</sup>             |
| O95997  | MATLIY <b>V</b> D <b>K</b> EN <b>G</b> E <b>P</b> GTRVVA                                  | ( <i>H.s.</i> Securin) <sup>63</sup>               |
| P21135  | TMFSY <b>G</b> EN <b>A</b> F <b>P</b> VTPISN                                              | ( <i>S.p.</i> Cut2) <sup>11</sup>                  |
| P40316  | MPANED <b>K</b> EN <b>N</b> IVYTGNES                                                      | ( <i>S.c.</i> Pds1) <sup>13</sup>                  |
| Q24454  | MDQIL <b>N</b> EN <b>T</b> GINLPANP                                                       | ( <i>D.s.</i> Pim (securin)) <sup>64</sup>         |
| P41410  | TVLS <b>K</b> N <b>K</b> EN <b>V</b> P <b>G</b> KLFK <b>K</b> F                           | ( <i>S.p.</i> Rhp54) <sup>65</sup>                 |
| P49454  | SPLSL <b>G</b> EN <b>L</b> AESSK <b>P</b> TA                                              | ( <i>H.s.</i> CENPF) <sup>66</sup>                 |
| Q563C3  | ISP <b>K</b> I <b>Q</b> EN <b>A</b> FSE <b>Q</b> SQIV                                     | ( <i>X.l.</i> Sororin) <sup>67</sup>               |
| P51955  | HFS <b>G</b> ES <b>K</b> EN <b>I</b> M <b>R</b> SENSES                                    | ( <i>H.s.</i> Nek2A) <sup>28</sup>                 |
| P13864  | KYDKED <b>K</b> EN <b>A</b> M <b>K</b> RRRC <b>G</b> V                                    | ( <i>M.m.</i> DNA methyltransferase) <sup>68</sup> |
| P27895  | MKNY <b>G</b> N <b>K</b> EN <b>A</b> T <b>K</b> DEMIEN                                    | ( <i>S.c.</i> Cin8) <sup>69</sup>                  |
| P04183  | PAGPD <b>N</b> EN <b>C</b> P <b>V</b> P <b>G</b> K <b>P</b> GE                            | ( <i>H.s.</i> Thymidine kinase) <sup>70</sup>      |
| P0c2x8  | WESS <b>L</b> N <b>K</b> EN <b>A</b> EY <b>G</b> H <b>S</b> NS-                           | ( <i>X.l.</i> Cdca3) <sup>55</sup>                 |
| Q08050  | KQEME <b>Y</b> EN <b>C</b> H <b>L</b> E <b>Q</b> R <b>Q</b> V <b>K</b>                    | ( <i>H.s.</i> FoxM1) <sup>34</sup>                 |
| Q4KLP7  | MDDL <b>T</b> EN <b>V</b> G <b>A</b> S <b>P</b> L <b>K</b> SS                             | ( <i>X.l.</i> Esco2) <sup>71</sup>                 |
| Q8WWK9  | KTK <b>M</b> AD <b>K</b> EN <b>M</b> K <b>R</b> PAES <b>K</b> N                           | ( <i>H.s.</i> CKAP2) <sup>72</sup>                 |
| Q99741  | PP <b>K</b> Q <b>G</b> K <b>K</b> EN <b>G</b> P <b>H</b> S <b>H</b> T <b>L</b> K          | ( <i>H.s.</i> Cdc6) <sup>48</sup>                  |
| Q9ULW0  | YY <b>K</b> E <b>A</b> EN <b>L</b> V <b>E</b> Q <b>S</b> I <b>P</b> SN                    | ( <i>H.s.</i> Tpx2) <sup>73</sup>                  |
| O94925  | GDS <b>D</b> NG <b>K</b> EN <b>Q</b> T <b>V</b> H <b>K</b> N <b>L</b> D <b>G</b>          | ( <i>H.s.</i> Glutaminase) <sup>74</sup>           |
| P03116  | AECES <b>D</b> EN <b>E</b> E <b>P</b> G <b>A</b> G <b>V</b> EL                            | ( <i>B. papillomavirus</i> E1) <sup>17</sup>       |
| P24869  | NNLL <b>D</b> D <b>K</b> EN <b>Q</b> D <b>P</b> SS <b>Q</b> Q <b>F</b> G                  | ( <i>S.c.</i> Clb2) <sup>75</sup>                  |
| P34244  | SG <b>V</b> ST <b>N</b> EN <b>E</b> G <b>P</b> E <b>Y</b> PT <b>K</b> I                   | ( <i>S.c.</i> Hs11) <sup>12</sup>                  |
| P41005  | MV <b>N</b> T <b>D</b> N <b>K</b> EN <b>E</b> P <b>N</b> ME <b>K</b> A <b>H</b>           | ( <i>S.p.</i> Mes1) <sup>24</sup>                  |
| P11157  | RL <b>T</b> L <b>A</b> D <b>K</b> EN <b>T</b> P <b>P</b> T <b>L</b> S <b>S</b> T <b>R</b> | ( <i>M.m.</i> Ribonucleoside-red M2) <sup>76</sup> |
| Q14807  | AQ <b>K</b> AE <b>E</b> EN <b>H</b> C <b>P</b> T <b>M</b> L <b>R</b> P <b>L</b>           | ( <i>H.s.</i> Kif22) <sup>77</sup>                 |
| Q96GD4  | MA <b>Q</b> EN <b>S</b> Y <b>P</b> W <b>P</b> Y <b>G</b> R <b>Q</b>                       | ( <i>H.s.</i> Aurora B) <sup>78</sup>              |

|        |                     |                                              |
|--------|---------------------|----------------------------------------------|
| P30304 | IDPDENKENEAFEFKPPV  | ( <i>H. s.</i> Cdc25A) <sup>79</sup>         |
| P30305 | SSSGEDKENDGFVFKMPW  | ( <i>H. s.</i> Cdc25B) <sup>80</sup>         |
| P30307 | CSSSANKENDNGNLVDSE  | ( <i>H. s.</i> Cdc25C) <sup>81</sup>         |
| Q04116 | IKSPKGKENRLKFNAYER  | ( <i>S. c.</i> YHP1) <sup>31</sup>           |
| Q5FBB7 | KRMSKYKENSSENKKTVP  | ( <i>H. s.</i> Shugoshin-like) <sup>42</sup> |
| Q9BXS6 | KPWGQSKENNYLNQHVNR  | ( <i>H. s.</i> Nusap1) <sup>82</sup>         |
| Q99618 | QGQDHDKENQHFPPLVES- | ( <i>H. s.</i> Tome-1) <sup>55</sup>         |
| Q12834 | ASFLLSKENQPENSQTPT  | ( <i>H. s.</i> Cdc20) <sup>83</sup>          |
| Q15004 | SPKDSEKENQIPPEEAGSS | ( <i>H. s.</i> PAF15) <sup>84</sup>          |
| Q8IWQ3 | EGGEAQKENGIVSVTFTL  | ( <i>H. s.</i> BRSK2) <sup>85</sup>          |
| Q9URT4 | DFMCTDKENVAFPLKTTT  | ( <i>S. p.</i> Ams2) <sup>86</sup>           |
| Q9URT4 | PVCDSKENDDLECYFRT   | ( <i>S. p.</i> Ams2) <sup>86</sup>           |
| Q9Y2M0 | LENSSQKENVFKCDSLKE  | ( <i>H. s.</i> Fan1) <sup>59</sup>           |

Text version of **Figure 5B**.

SEDKENVPP (most frequent)  
DAN Q L  
ELE A K  
LTS I F  
MGQ E (least frequent)

## C

- 1 Glotzer, M., Murray, A. W. & Kirschner, M. W. Cyclin is degraded by the ubiquitin pathway. *Nature* **349**, 132-138, (1991).
- 2 King, R. W., Glotzer, M. & Kirschner, M. W. Mutagenic analysis of the destruction signal of mitotic cyclins and structural characterization of ubiquitinated intermediates. *Mol Biol Cell* **7**, 1343-1357 (1996).
- 3 Yamano, H., Gannon, J. & Hunt, T. The role of proteolysis in cell cycle progression in *Schizosaccharomyces pombe*. *EMBO J* **15**, 5268-5279 (1996).
- 4 den Elzen, N. & Pines, J. Cyclin A is destroyed in prometaphase and can delay chromosome alignment and anaphase. *J Cell Biol* **153**, 121-136 (2001).
- 5 Clute, P. & Pines, J. Temporal and spatial control of cyclin B1 destruction in metaphase. *Nat Cell Biol* **1**, 82-87 (1999).
- 6 Amon, A., Irniger, S. & Nasmyth, K. Closing the cell cycle circle in yeast: G2 cyclin proteolysis initiated at mitosis persists until the activation of G1 cyclins in the next cycle. *Cell* **77**, 1037-1050 (1994).
- 7 Sari, F., Braus, G. H. & Irniger, S. A process independent of the anaphase-promoting complex contributes to instability of the yeast S phase cyclin Clb5. *J Biol Chem* **282**, 26614-26622 (2007).
- 8 Lorca, T. *et al.* Cyclin A-Cys41 does not undergo cell cycle-dependent degradation in *Xenopus* extracts. *FEBS Lett* **306**, 90-93 (1992).
- 9 Kobayashi, H. *et al.* Identification of the domains in cyclin A required for binding to, and activation of, p34cdc2 and p32cdk2 protein kinase subunits. *Mol Biol Cell* **3**, 1279-1294 (1992).
- 10 Yamano, H. *et al.* The spike of S phase cyclin Cig2 expression at the G1-S border in fission yeast requires both APC and SCF ubiquitin ligases. *Mol Cell* **6**, 1377-1387 (2000).
- 11 Funabiki, H. *et al.* Fission yeast Cut2 required for anaphase has two destruction boxes. *EMBO J* **16**, 5977-5987 (1997).
- 12 Burton, J. L. & Solomon, M. J. D box and KEN box motifs in budding yeast Hsl1p are required for APC-mediated degradation and direct binding to Cdc20p and Cdh1p. *Genes Dev* **15**, 2381-2395 (2001).



- 13 Hilioti, Z., Chung, Y. S., Mochizuki, Y., Hardy, C. F. & Cohen-Fix, O. The anaphase  
inhibitor Pds1 binds to the APC/C-associated protein Cdc20 in a destruction box-  
dependent manner. *Curr Biol* **11**, 1347-1352 (2001).
- 14 Zou, H., McGarry, T. J., Bernal, T. & Kirschner, M. W. Identification of a vertebrate  
sister-chromatid separation inhibitor involved in transformation and tumorigenesis.  
*Science* **285**, 418-422 (1999).
- 15 Horn, S. R. *et al.* Regulation of mitochondrial morphology by APC/CCdh1-mediated  
control of Drp1 stability. *Mol Biol Cell* **22**, 1207-1216 (2011).
- 16 McGarry, T. J. & Kirschner, M. W. Geminin, an inhibitor of DNA replication, is  
degraded during mitosis. *Cell* **93**, 1043-1053 (1998).
- 17 Lindon, C., Albagli, O., Domeyne, P., Montarras, D. & Pinset, C. Constitutive  
instability of muscle regulatory factor Myf5 is distinct from its mitosis-specific  
disappearance, which requires a D-box-like motif overlapping the basic domain. *Mol  
Cell Biol* **20**, 8923-8932 (2000).
- 18 Wan, Y., Liu, X. & Kirschner, M. W. The anaphase-promoting complex mediates  
TGF-beta signaling by targeting SnoN for destruction. *Mol Cell* **8**, 1027-1039 (2001).
- 19 Li, M. *et al.* The adaptor protein of the anaphase promoting complex Cdh1 is  
essential in maintaining replicative lifespan and in learning and memory. *Nat Cell  
Biol* **10**, 1083-1089 (2008).
- 20 Ferreira, M. F., Santocanale, C., Drury, L. S. & Diffley, J. F. Dbf4p, an essential S  
phase-promoting factor, is targeted for degradation by the anaphase-promoting  
complex. *Mol Cell Biol* **20**, 242-248 (2000).
- 21 Cui, Y. *et al.* Degradation of the human mitotic checkpoint kinase Mps1 is cell cycle-  
regulated by APC-cCdc20 and APC-cCdh1 ubiquitin ligases. *J Biol Chem* **285**,  
32988-32998 (2010).
- 22 Amador, V., Ge, S., Santamaria, P. G., Guardavaccaro, D. & Pagano, M.  
APC/C(Cdc20) controls the ubiquitin-mediated degradation of p21 in prometaphase.  
*Mol Cell* **27**, 462-473 (2007).
- 23 Mallory, M. J., Cooper, K. F. & Strich, R. Meiosis-specific destruction of the Ume6p  
repressor by the Cdc20-directed APC/C. *Mol Cell* **27**, 951-961 (2007).
- 24 Kimata, Y. *et al.* A mutual inhibition between APC/C and its substrate Mes1 required  
for meiotic progression in fission yeast. *Dev Cell* **14**, 446-454 (2008).
- 25 Lasorella, A. *et al.* Degradation of Id2 by the anaphase-promoting complex couples  
cell cycle exit and axonal growth. *Nature* **442**, 471-474 (2006).
- 26 Fu, A. K. *et al.* APC(Cdh1) mediates EphA4-dependent downregulation of AMPA  
receptors in homeostatic plasticity. *Nat Neurosci* **14**, 181-189 (2011).
- 27 Burton, J. L. & Solomon, M. J. Mad3p, a pseudosubstrate inhibitor of APCCdc20 in  
the spindle assembly checkpoint. *Genes Dev* **21**, 655-6677 (2007).
- 28 Hames, R. S., Wattam, S. L., Yamano, H., Bacchieri, R. & Fry, A. M. APC/C-  
mediated destruction of the centrosomal kinase Nek2A occurs in early mitosis and  
depends upon a cyclin A-type D-box. *EMBO J* **20**, 7117-7127 (2001).
- 29 Lindon, C. & Pines, J. Ordered proteolysis in anaphase inactivates Plk1 to  
contribute to proper mitotic exit in human cells. *J Cell Biol* **164**, 233-241 (2004).
- 30 Shirayama, M., Zachariae, W., Ciosk, R. & Nasmyth, K. The Polo-like kinase Cdc5p  
and the WD-repeat protein Cdc20p/fizzy are regulators and substrates of the  
anaphase promoting complex in *Saccharomyces cerevisiae*. *EMBO J* **17**, 1336-  
1349 (1998).
- 31 Ostapenko, D. & Solomon, M. J. Anaphase promoting complex-dependent  
degradation of transcriptional repressors Nrm1 and Yhp1 in *Saccharomyces  
cerevisiae*. *Mol Biol Cell* **22**, 2175-2184 (2011).
- 32 Ganner, A. *et al.* Regulation of ciliary polarity by the APC/C. *Proc Natl Acad Sci U S  
A* **106**, 17799-17804 (2009).
- 33 Harley, M. E., Allan, L. A., Sanderson, H. S. & Clarke, P. R. Phosphorylation of Mcl-  
1 by CDK1-cyclin B1 initiates its Cdc20-dependent destruction during mitotic arrest.  
*EMBO J* **29**, 2407-2420 (2010).
- 34 Laoukili, J., Alvarez-Fernandez, M., Stahl, M. & Medema, R. H. FoxM1 is degraded  
at mitotic exit in a Cdh1-dependent manner. *Cell Cycle* **7**, 2720-2726 (2008).
- 35 Enquist-Newman, M., Sullivan, M. & Morgan, D. O. Modulation of the mitotic  
regulatory network by APC-dependent destruction of the Cdh1 inhibitor Acn1. *Mol  
Cell* **30**, 437-446 (2008).

36 Ostapenko, D., Burton, J. L., Wang, R. & Solomon, M. J. Pseudosubstrate inhibition  
of the anaphase-promoting complex by Acm1: regulation by proteolysis and Cdc28  
37 phosphorylation. *Mol Cell Biol* **28**, 4653-4664 (2008).

38 Choi, E., Dial, J. M., Jeong, D. E. & Hall, M. C. Unique D box and KEN box  
sequences limit ubiquitination of Acm1 and promote pseudosubstrate inhibition of  
the anaphase-promoting complex. *J Biol Chem* **283**, 23701-23710 (2008).

39 Bashir, T., Dorrello, N. V., Amador, V., Guardavaccaro, D. & Pagano, M. Control of  
the SCF(Skp2-Cks1) ubiquitin ligase by the APC/C(Cdh1) ubiquitin ligase. *Nature*  
40 **428**, 190-193 (2004).

41 Wei, W. *et al.* Degradation of the SCF component Skp2 in cell-cycle phase G1 by  
the anaphase-promoting complex. *Nature* **428**, 194-198 (2004).

42 Strunk, K. E. *et al.* HER4 D-box sequences regulate mitotic progression and  
degradation of the nuclear HER4 cleavage product s80HER4. *Cancer Res* **67**,  
43 6582-6590 (2007).

44 Yang, Y. *et al.* A Cdc20-APC ubiquitin signaling pathway regulates presynaptic  
differentiation. *Science* **326**, 575-578 (2009).

45 Karamysheva, Z., Diaz-Martinez, L. A., Crow, S. E., Li, B. & Yu, H. Multiple  
anaphase-promoting complex/cyclosome degrons mediate the degradation of  
human Sgo1. *J Biol Chem* **284**, 1772-1780 (2009).

46 Littlepage, L. E. & Ruderman, J. V. Identification of a new APC/C recognition  
domain, the A box, which is required for the Cdh1-dependent destruction of the  
kinase Aurora-A during mitotic exit. *Genes Dev* **16**, 2274-2285 (2002).

47 Castro, A. *et al.* APC/Fizzy-Related targets Aurora-A kinase for proteolysis. *EMBO*  
48 *Rep* **3**, 457-462 (2002).

49 Stewart, S. & Fang, G. Destruction box-dependent degradation of aurora B is  
mediated by the anaphase-promoting complex/cyclosome and Cdh1. *Cancer Res*  
50 **65**, 8730-8735 (2005).

51 Puklowski, A. *et al.* The SCF-FBXW5 E3-ubiquitin ligase is regulated by PLK4 and  
targets HsSAS-6 to control centrosome duplication. *Nat Cell Biol* **13**, 1004-1009  
(2011).

52 Ohoka, N., Sakai, S., Onozaki, K., Nakanishi, M. & Hayashi, H. Anaphase-  
promoting complex/cyclosome-cdh1 mediates the ubiquitination and degradation of  
TRB3. *Biochem Biophys Res Commun* **392**, 289-294 (2010).

53 Mailand, N. & Diffley, J. F. CDKs promote DNA replication origin licensing in human  
cells by protecting Cdc6 from APC/C-dependent proteolysis. *Cell* **122**, 915-926  
(2005).

54 Zhao, W. M. *et al.* RCS1, a substrate of APC/C, controls the metaphase to  
anaphase transition. *Proc Natl Acad Sci U S A* **105**, 13415-13420 (2008).

55 Yamanaka, A. *et al.* Cell cycle-dependent expression of mammalian E2-C regulated  
by the anaphase-promoting complex/cyclosome. *Mol Biol Cell* **11**, 2821-2831  
(2000).

56 Han, Y. *et al.* Rice ROOT ARCHITECTURE ASSOCIATED1 binds the proteasome  
subunit RPT4 and is degraded in a D-box and proteasome-dependent manner.  
57 *Plant Physiol* **148**, 843-855 (2008).

58 Zhao, W. M. & Fang, G. Anillin is a substrate of anaphase-promoting  
complex/cyclosome (APC/C) that controls spatial contractility of myosin during late  
cytokinesis. *J Biol Chem* **280**, 33516-33524 (2005).

59 Gabellini, D. *et al.* Early mitotic degradation of the homeoprotein HOXC10 is  
potentially linked to cell cycle progression. *EMBO J* **22**, 3715-3724 (2003).

60 Miller, J. J. *et al.* Emi1 stably binds and inhibits the anaphase-promoting  
complex/cyclosome as a pseudosubstrate inhibitor. *Genes Dev* **20**, 2410-2420  
(2006).

61 Ayad, N. G. *et al.* Tome-1, a trigger of mitotic entry, is degraded during G1 via the  
APC. *Cell* **113**, 101-113 (2003).

62 Cho, H. J. *et al.* Degradation of human RAP80 is cell cycle regulated by Cdc20 and  
Cdh1 ubiquitin ligases. *Mol Cancer Res* **10**, 615-625 (2012).

63 Woodbury, E. L. & Morgan, D. O. Cdk and APC activities limit the spindle-stabilizing  
function of Fin1 to anaphase. *Nat Cell Biol* **9**, 106-112 (2007).

64 Juang, Y. L. *et al.* APC-mediated proteolysis of Ase1 and the morphogenesis of the  
mitotic spindle. *Science* **275**, 1311-1314 (1997).



59 Lai, F. *et al.* Human KIAA1018/FAN1 nuclease is a new mitotic substrate of  
60 APC/C(Cdh1). *Chin J Cancer* **31**, 440-448 (2012).

61 King, E. M., van der Sar, S. J. & Hardwick, K. G. Mad3 KEN boxes mediate both  
62 Cdc20 and Mad3 turnover, and are critical for the spindle checkpoint. *PLoS One* **2**,  
e342 (2007).

63 Elowe, S. *et al.* Uncoupling of the spindle-checkpoint and chromosome-congression  
64 functions of BubR1. *J Cell Sci* **123**, 84-94 (2010).

65 Qi, W. & Yu, H. KEN-box-dependent degradation of the Bub1 spindle checkpoint  
66 kinase by the anaphase-promoting complex/cyclosome. *J Biol Chem* **282**, 3672-  
3679 (2007).

67 Zur, A. & Brandeis, M. Securin degradation is mediated by fzy and fzr, and is  
68 required for complete chromatid separation but not for cytokinesis. *EMBO J* **20**,  
792-801 (2001).

69 Leismann, O. & Lehner, C. F. Drosophila securin destruction involves a D-box and a  
70 KEN-box and promotes anaphase in parallel with Cyclin A degradation. *J Cell Sci*  
**116**, 2453-2460 (2003).

71 Trickey, M., Grimaldi, M. & Yamano, H. The anaphase-promoting  
72 complex/cyclosome controls repair and recombination by ubiquitylating Rhp54 in  
73 fission yeast. *Mol Cell Biol* **28**, 3905-3916 (2008).

74 Gurden, M. D. *et al.* Cdc20 is required for the post-anaphase, KEN-dependent  
75 degradation of centromere protein F. *J Cell Sci* **123**, 321-330 (2010).

76 Rankin, S., Ayad, N. G. & Kirschner, M. W. Sororin, a substrate of the anaphase-  
77 promoting complex, is required for sister chromatid cohesion in vertebrates. *Mol*  
*Cell* **18**, 185-200 (2005).

78 Ghoshal, K. *et al.* 5-Aza-deoxycytidine induces selective degradation of DNA  
79 methyltransferase 1 by a proteasomal pathway that requires the KEN box, bromo-  
80 adjacent homology domain, and nuclear localization signal. *Mol Cell Biol* **25**, 4727-  
4741 (2005).

Hildebrandt, E. R. & Hoyt, M. A. Cell cycle-dependent degradation of the  
Saccharomyces cerevisiae spindle motor Cin8p requires APC(Cdh1) and a bipartite  
destruction sequence. *Mol Biol Cell* **12**, 3402-3416 (2001).

Ke, P. Y. & Chang, Z. F. Mitotic degradation of human thymidine kinase 1 is  
dependent on the anaphase-promoting complex/cyclosome-CDH1-mediated  
pathway. *Mol Cell Biol* **24**, 514-526 (2004).

Lafont, A. L., Song, J. & Rankin, S. Sororin cooperates with the acetyltransferase  
Eco2 to ensure DNA replication-dependent sister chromatid cohesion. *Proc Natl*  
*Acad Sci U S A* **107**, 20364-20369 (2010).

Seki, A. & Fang, G. CKAP2 is a spindle-associated protein degraded by APC/C-  
Cdh1 during mitotic exit. *J Biol Chem* **282**, 15103-15113 (2007).

Stewart, S. & Fang, G. Anaphase-promoting complex/cyclosome controls the  
stability of TPX2 during mitotic exit. *Mol Cell Biol* **25**, 10516-10527 (2005).

Colombo, S. L. *et al.* Anaphase-promoting complex/cyclosome-Cdh1 coordinates  
glycolysis and glutaminolysis with transition to S phase in human T lymphocytes.  
*Proc Natl Acad Sci U S A* **107**, 18868-18873 (2010).

Hendrickson, C., Meyn, M. A., 3rd, Morabito, L. & Holloway, S. L. The KEN box  
regulates Clb2 proteolysis in G1 and at the metaphase-to-anaphase transition. *Curr*  
*Biol* **11**, 1781-1787 (2001).

Chabes, A. L., Pflieger, C. M., Kirschner, M. W. & Thelander, L. Mouse  
ribonucleotide reductase R2 protein: a new target for anaphase-promoting complex-  
Cdh1-mediated proteolysis. *Proc Natl Acad Sci U S A* **100**, 3925-3929 (2003).

Feine, O., Zur, A., Mahbubani, H. & Brandeis, M. Human Kid is degraded by the  
APC/C(Cdh1) but not by the APC/C(Cdc20). *Cell Cycle* **6**, 2516-2523 (2007).

Nguyen, H. G., Chinnappan, D., Urano, T. & Ravid, K. Mechanism of Aurora-B  
degradation and its dependency on intact KEN and A-boxes: identification of an  
aneuploidy-promoting property. *Mol Cell Biol* **25**, 4977-4992 (2005).

Donzelli, M. *et al.* Dual mode of degradation of Cdc25 A phosphatase. *EMBO J* **21**,  
4875-4884 (2002).

Kieffer, I., Lorenzo, C., Dozier, C., Schmitt, E. & Ducommun, B. Differential mitotic  
degradation of the CDC25B phosphatase variants. *Oncogene* **26**, 7847-7858  
(2007).

- 81 Chen, F. *et al.* Arsenite-induced Cdc25C degradation is through the KEN-box and  
ubiquitin-proteasome pathway. *Proc Natl Acad Sci U S A* **99**, 1990-1995 (2002).
- 82 Li, L. *et al.* NuSAP is degraded by APC/C-Cdh1 and its overexpression results in  
mitotic arrest dependent of its microtubules' affinity. *Cell Signal* **19**, 2046-2055  
(2007).
- 83 Pflieger, C. M. & Kirschner, M. W. The KEN box: an APC recognition signal distinct  
from the D box targeted by Cdh1. *Genes Dev* **14**, 655-665 (2000).
- 84 Emanuele, M. J., Ciccio, A., Elia, A. E. & Elledge, S. J. Proliferating cell nuclear  
antigen (PCNA)-associated KIAA0101/PAF15 protein is a cell cycle-regulated  
anaphase-promoting complex/cyclosome substrate. *Proc Natl Acad Sci U S A* **108**,  
9845-9850 (2011).
- 85 Li, R. *et al.* APC/C(Cdh1) targets brain-specific kinase 2 (BRSK2) for degradation  
via the ubiquitin-proteasome pathway. *PLoS One* **7**, e45932 (2012).
- 86 Trickey, M., Fujimitsu, K. & Yamano, H. Anaphase-promoting Complex/Cyclosome-  
mediated Proteolysis of Ams2 in the G1 Phase Ensures the Coupling of Histone  
Gene Expression to DNA Replication in Fission Yeast. *J Biol Chem* **288**, 928-937  
(2013).

### **Figure S3. Sequence Alignment of Experimentally Validated D Box and KEN Box Motifs, Related to Figures 5A and 5B**

(A) Multiple sequence alignment of D box motifs validated by mutagenesis and used to generate the D box consensus sequence (**Figure 5A**). Conserved Arg (P1) and Leu (P4) residues indicated in red, conserved residues at P(6,7,8,9) are in green. Uniprot ID and primary citation are given.

(B) Multiple sequence alignment of KEN box motifs validated by mutagenesis and used to generate the KEN box consensus sequence (**Figure 5B**). Conserved Lys (P1), Glu (P2) and Asn (P3) residues indicated in red, conserved residues at P-1 and C-terminal prolines (P+2 and P+3) are in green. Uniprot ID and primary citation are given.

(C) References for Figure S3.

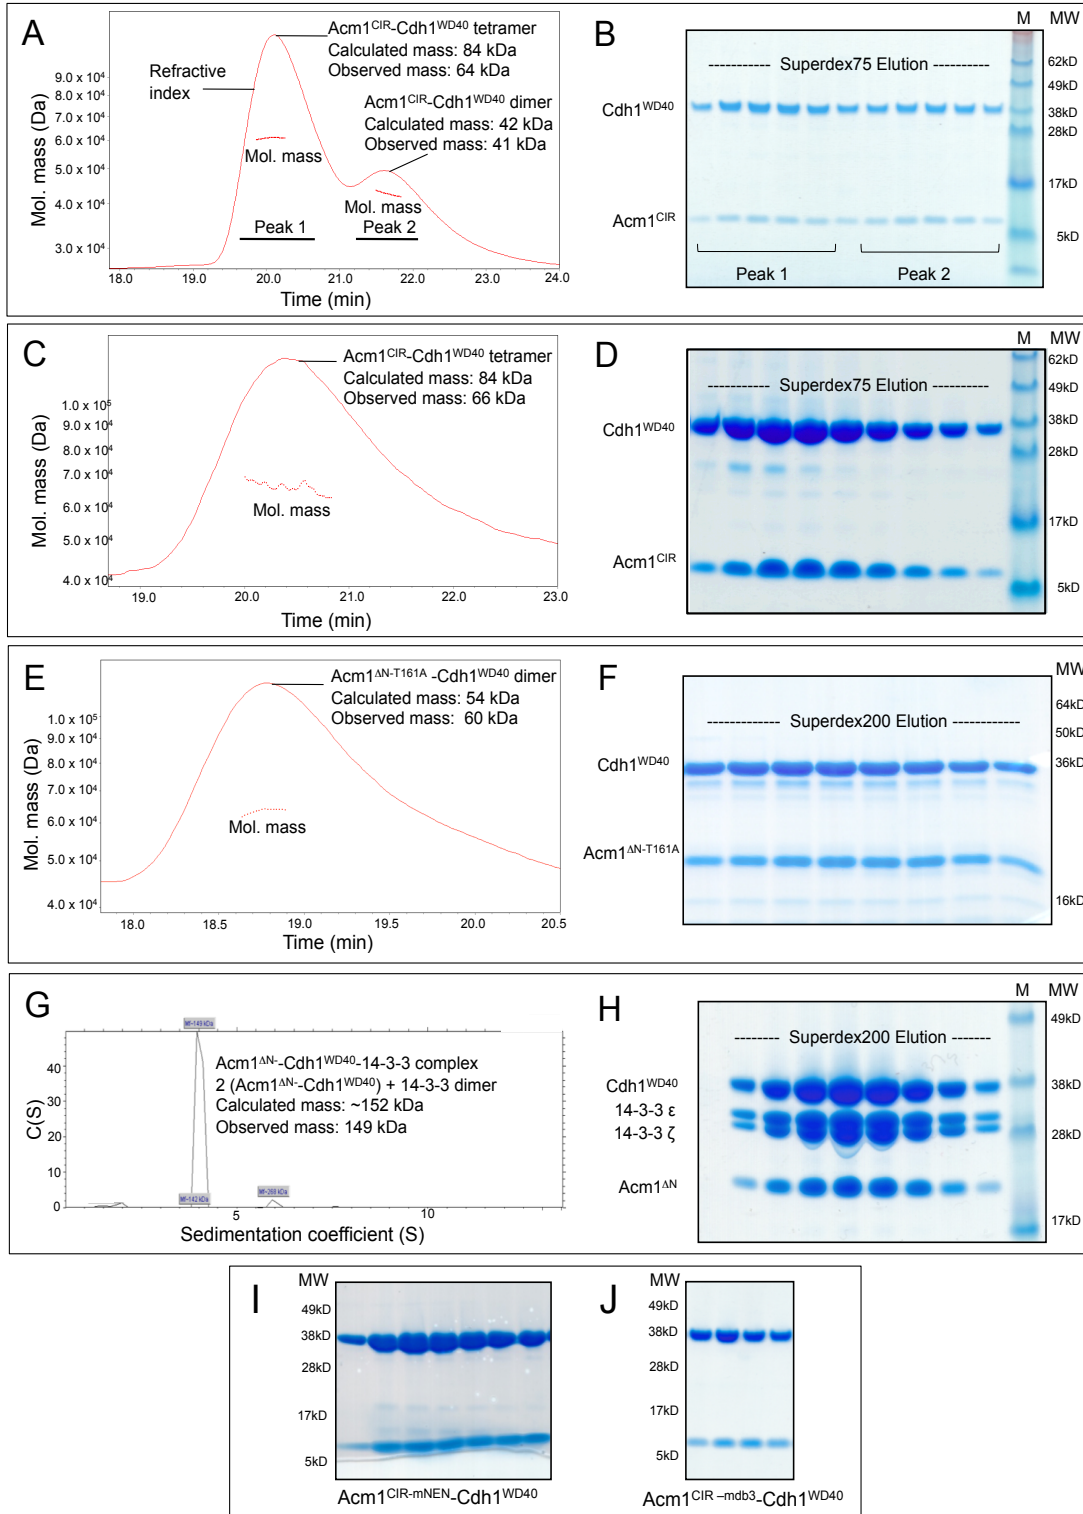

**Figure S4. Oligomeric states of Acm1-Cdh1 complexes.** Related to Figure 6.

(A) MALS analysis shows that Acm1<sup>CIR</sup>-Cdh1<sup>WD40</sup> forms both heterotetrameric (Peak 1) and heterodimeric (Peak 2) species at ~1 mg/ml without glycerol. (B) SDS PAGE gel of

Acm1<sup>CIR</sup>-Cdh1<sup>WD40</sup>. Shown is the eluate from an equivalent Superdex 75 size exclusion column to that used for the MALS experiment. Peak 1 corresponds to the heterotetrameric state of the Acm1<sup>CIR</sup>-Cdh1<sup>WD40</sup> complex and Peak 2 corresponds to the heterodimer. Associated size exclusion chromatograph is shown in **Figure 6C**. **(C)** MALS analysis shows that Acm1<sup>CIR</sup>-Cdh1<sup>WD40</sup> in 10% (v/v) glycerol exists only as a heterotetrameric species at ~1 mg/ml. **(D)** SDS PAGE gel of Acm1<sup>CIR</sup>-Cdh1<sup>WD40</sup> in 10% glycerol. Shown is the eluate from an equivalent Superdex 75 size exclusion column to that used for the MALS experiment. Associated size exclusion chromatograph is shown in **Figure 6C**. **(E)** MALS data of Acm1<sup>DN-T161A</sup>-Cdh1<sup>WD40</sup> shows a heterodimer at ~1 mg/ml in 10%(v/v) glycerol. **(F)** SDS PAGE gel showing eluate from an equivalent Superdex 200 size exclusion column to that used for the MALS experiment. **(G)** AUC data showing that the Acm1<sup>DN</sup>-Cdh1<sup>WD40</sup>-14-3-3 complex (1.5 mg/ml and 10% (v/v) glycerol) is consistent with two molecules each of Acm1<sup>DN</sup> and Cdh1<sup>WD40</sup> and a 14-3-3 dimer of a 1:1 ratio of 14-3-3  $\epsilon$  and 14-3-3  $\zeta$  based on *Bombyx mori* sequence similarity. Calculated molecular mass of the insect cell 14-3-3 dimer was estimated based on *Bombyx mori* 14-3-3  $\epsilon$  and 14-3-3  $\zeta$  sequences. **(H)** SDS PAGE gel for Acm1<sup>DN</sup>-Cdh1<sup>WD40</sup>-14-3-3 complex. The 14-3-3  $\epsilon$  and 14-3-3  $\zeta$  subunits were identified by mass spectrometry as being related to *Bombyx mori* 14-3-3  $\epsilon$  and 14-3-3  $\zeta$  proteins. **(I)** SDS PAGE gel for Acm1<sup>CIR-mNEN</sup>-Cdh1<sup>WD40</sup> complex. **(J)** SDS PAGE gel for Acm1<sup>CIR-mdb3</sup>-Cdh1<sup>WD40</sup> complex.
